# Supplementary material
Source: PubMed Central journal article supplement (PMC4813330)
Supplement: NIHMS736487-supplement-3.pdf [file NIHMS736487-supplement-3.pdf]

**A** Cy3B/BHQ ribosome FRET signal

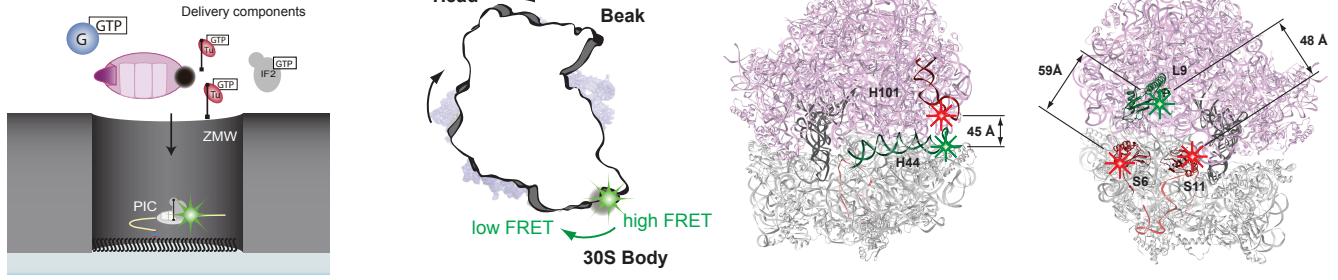

**B**

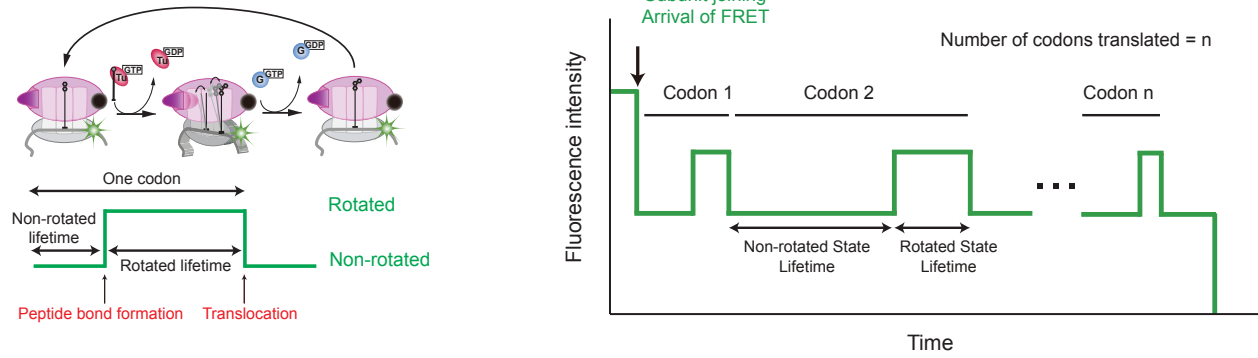

**C** Combining conformational and compositional signals

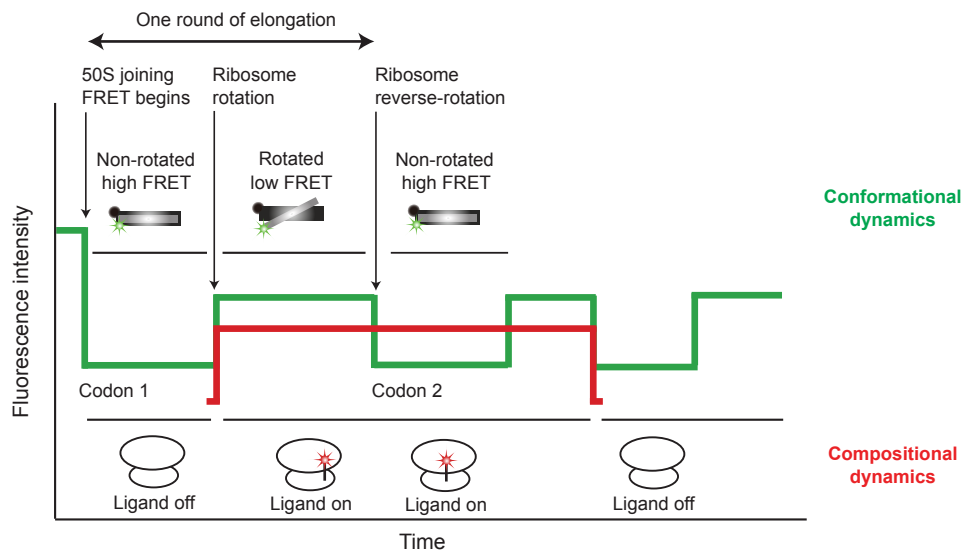

Figure S1
