# Supplementary material
Source: PubMed Central journal article supplement (PMC4813330)

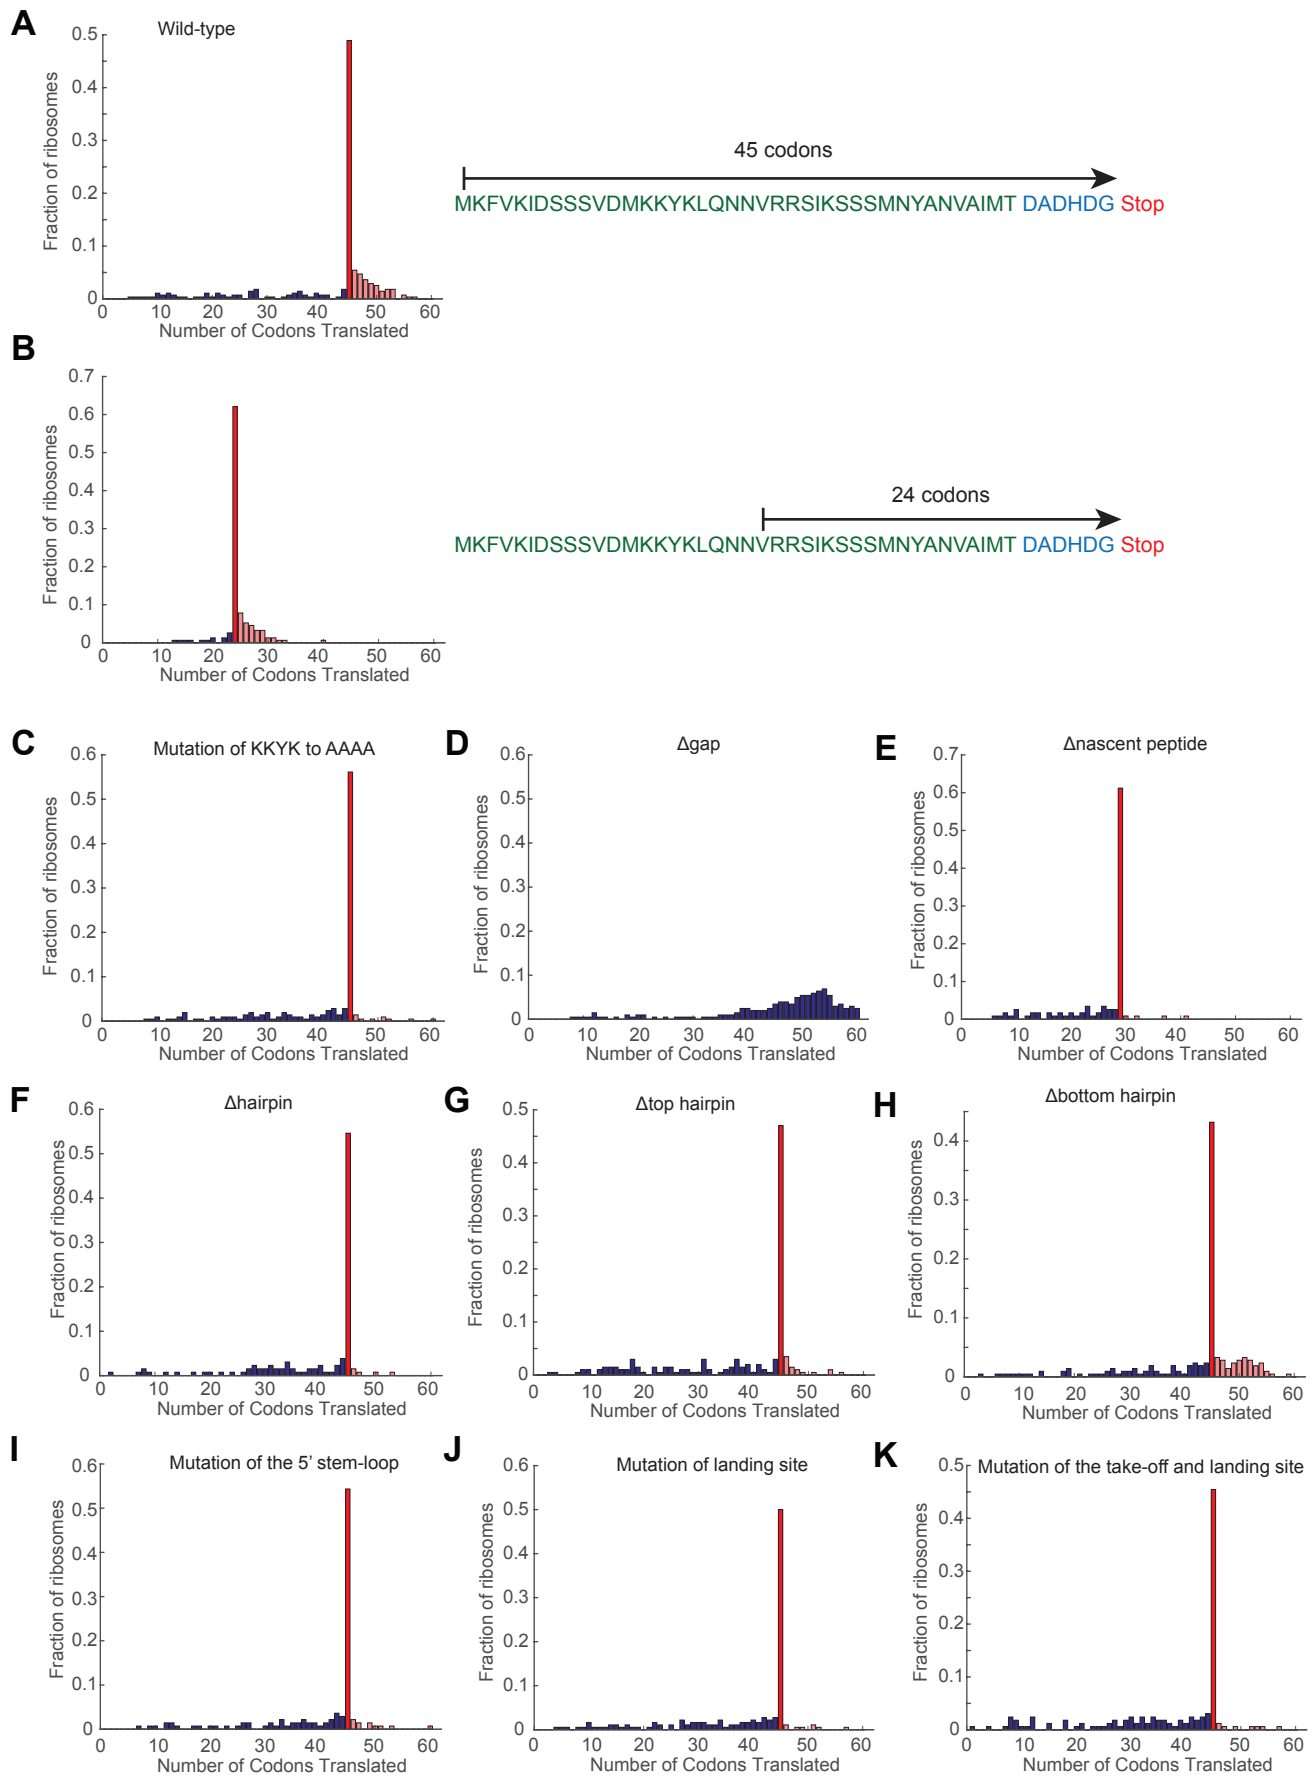

Figure S2

Supplement: NIHMS736487-supplement-4.pdf [file NIHMS736487-supplement-4.pdf]

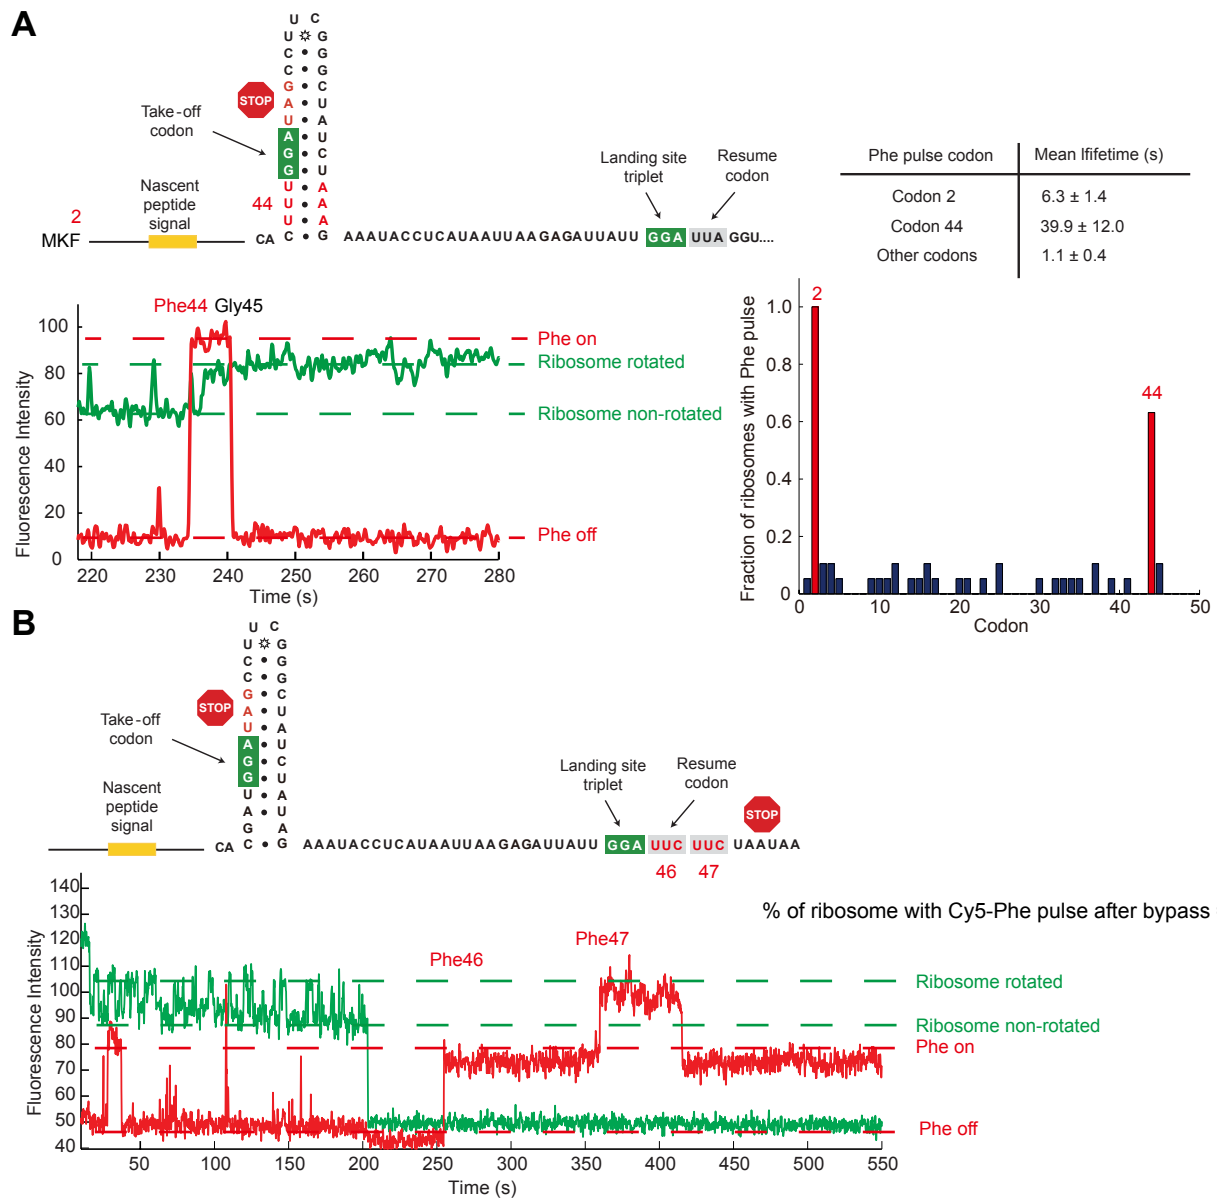

Figure S3

Supplement: NIHMS736487-supplement-5.pdf [file NIHMS736487-supplement-5.pdf]

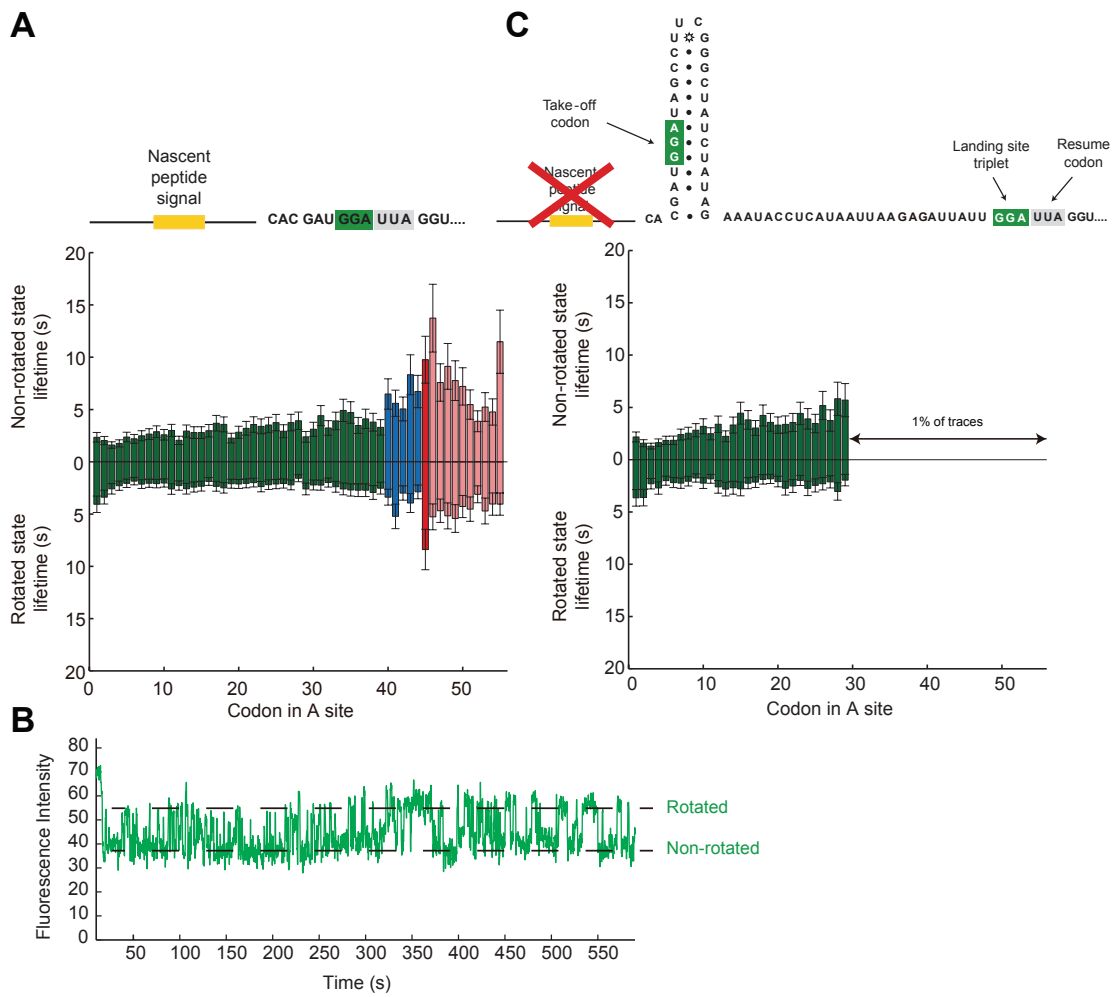

Figure S4

Supplement: NIHMS736487-supplement-6.pdf [file NIHMS736487-supplement-6.pdf]

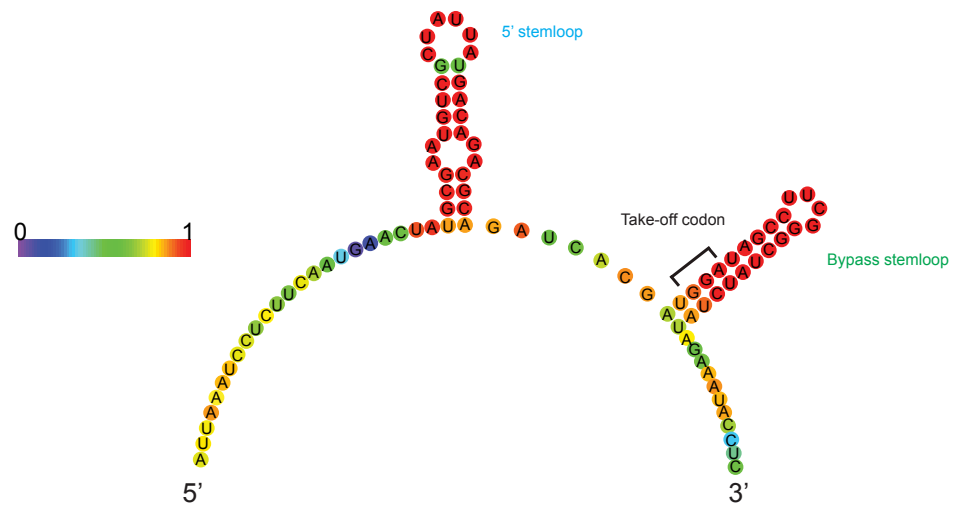

Figure S5

Supplement: NIHMS736487-supplement-7.pdf [file NIHMS736487-supplement-7.pdf]

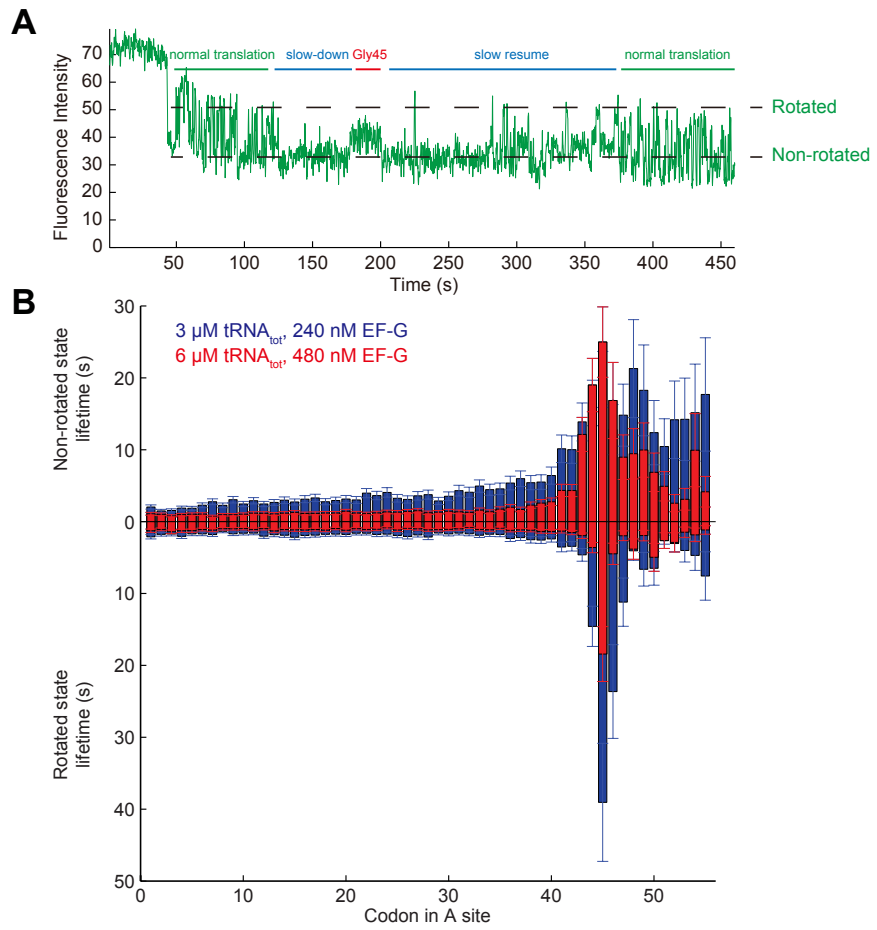

Figure S6

Supplement: NIHMS736487-supplement-8.pdf [file NIHMS736487-supplement-8.pdf]

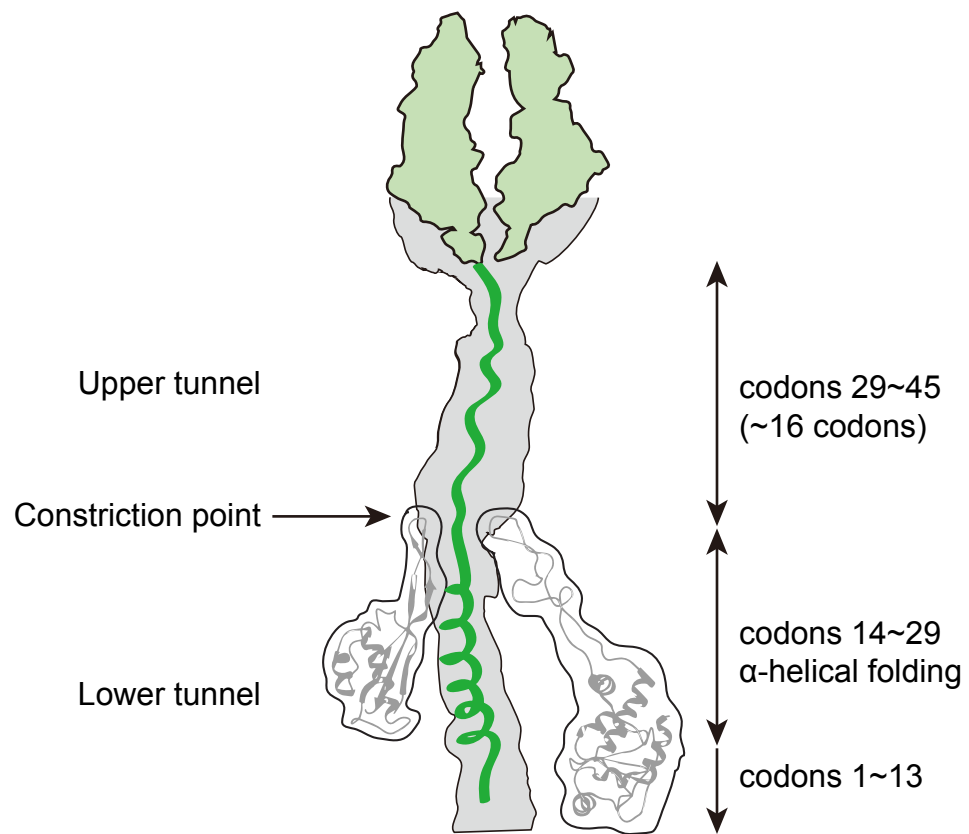

Figure S7

Supplement: NIHMS736487-supplement-9.pdf [file NIHMS736487-supplement-9.pdf]
